# Supplementary material for: Declining, seasonal-varying emissions of sulfur hexafluoride from the United States point to a new mitigation opportunity
Source: Copernicus journal article supplement (doi:10.5194/egusphere-2022-862), 2022-09-15
Supplement: Supplementary file 1 [file egusphere-2022-862-supplement-version3.pdf]

1 **Supplementary materials for:**

2  
3  
4 **Declining, seasonal-varying emissions of sulfur hexafluoride from**  
5 **the United States**

6  
7 Lei Hu<sup>1\*</sup>, Deborah Ottinger<sup>2</sup>, Stephanie Bogle<sup>2</sup>, Stephen A. Montzka<sup>1</sup>, Philip L. DeCola<sup>3,4</sup>, Ed  
8 Dlugokencky<sup>1</sup>, Arlyn Andrews<sup>1</sup>, Kirk Thoning<sup>1</sup>, Colm Sweeney<sup>1</sup>, Geoff Dutton<sup>1,5</sup>, Lauren Aeppli<sup>2</sup>,  
9 Andrew Crotwell<sup>1,5</sup>

10  
11 <sup>1</sup> Global Monitoring Laboratory, US National Oceanic and Atmospheric Administration, Boulder,  
12 CO, USA

13 <sup>2</sup> Climate Change Division, US Environmental Protection Agency, Washington D.C., USA

14 <sup>3</sup> Department of Atmospheric and Oceanic Sciences, University of Maryland, College Park, MD,  
15 USA

16 <sup>4</sup> GIST.Earth LLC, Washington DC, USA

17 <sup>5</sup> Cooperative Institute for Research in Environmental Sciences, University of Colorado-Boulder,  
18 Boulder, CO, USA

19  
20 \*Correspondence to lei.hu@noaa.gov

21  
22  
23  
24  
25 **Figures S1 – S4.**

26  
27  
28  
29  
30  
31  
32  
33  
34  
35  
36  
37  
38  
39  
40

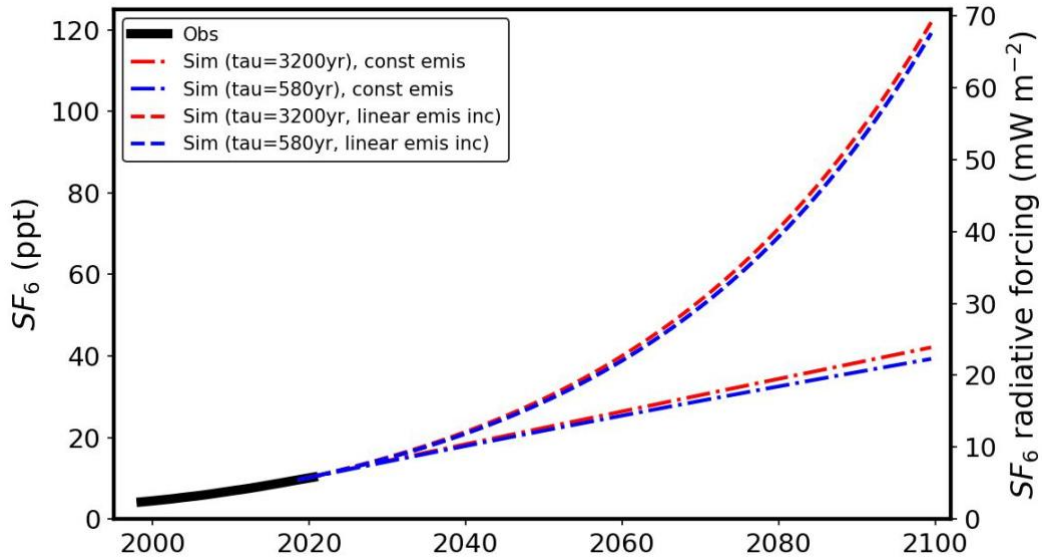

41  
42  
43  
44  
45  
46  
47  
48  
49

**Fig. S1.** Global atmospheric SF<sub>6</sub> mole fractions observed by NOAA for 1998 – 2021 and projected to 2100, considering two different atmospheric lifetimes (580 years and 3200 years) and two emission scenarios (a constant global emission of 9 Gg yr<sup>-1</sup> “const emiss” and a constant emission increase of 0.2 (Gg yr<sup>-1</sup>) yr<sup>-1</sup> with an initial global emission of 9 Gg yr<sup>-1</sup> in 2018 “linear emis inc”). The corresponding radiative forcing is plotted on the right.

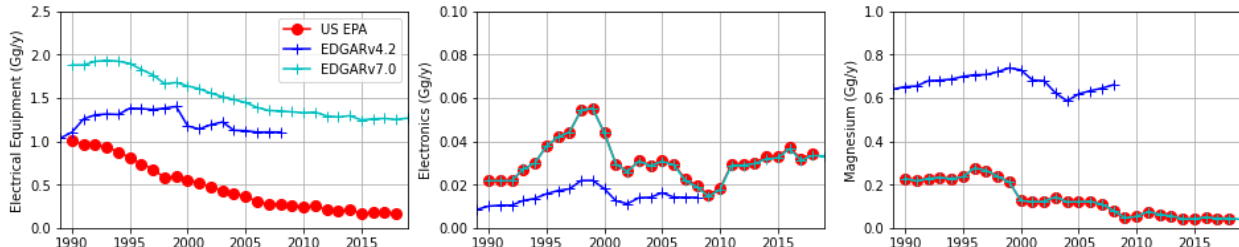

50  
51  
52  
53  
54  
55  
56

**Fig. S2.** National total sector emissions reported by the U.S. EPA national greenhouse gas inventory, EDGAR version 4.2 (EDGARv4.2) and EDGAR version 7.0 (EDGARv7.0) for electrical transformation and distribution, electronics industries, and magnesium production.

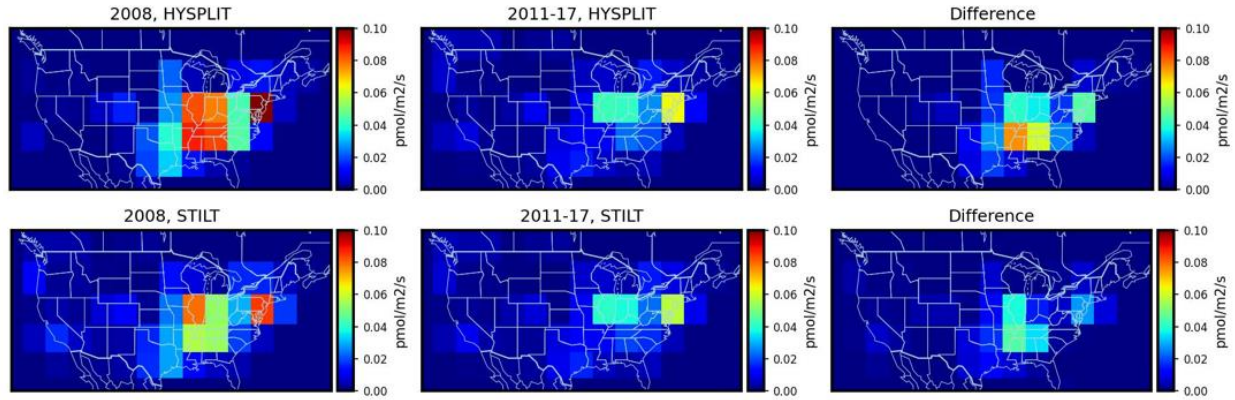

57  
 58 **Fig. S3.** Emission maps of SF<sub>6</sub> derived from atmospheric observations using two transport models  
 59 (HYSPLIT-NAMS in upper panels and WRF-STILT in lower panels) for 2008 and 2011- 2017  
 60 periods. The third columns indicate emission differences between both periods.  
 61  
 62

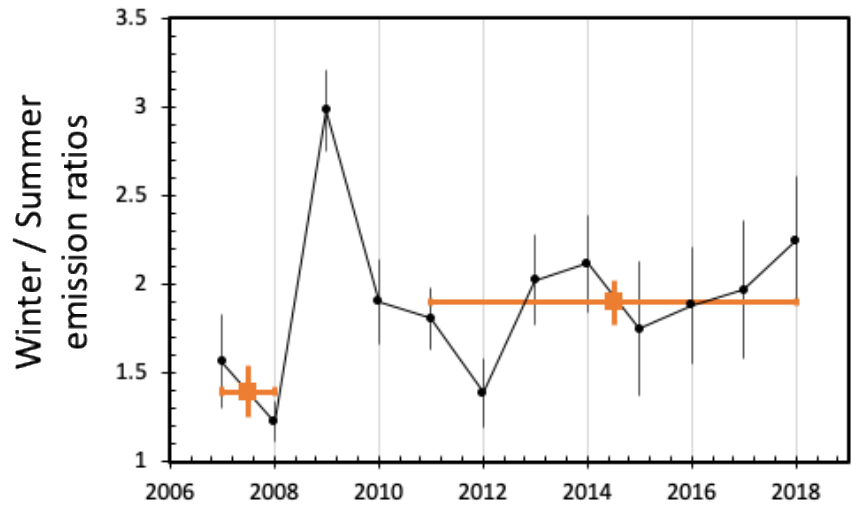

63  
 64 **Fig. S4.** The winter-to-summer ratios of U.S. national SF<sub>6</sub> emissions between winter (Nov - Feb)  
 65 and summer (May - Aug) by year, derived from the atmospheric observations. Errorbars represent  
 66 one standard deviation derived from 12 ensemble members. Orange squares indicate multi-year  
 67 average ratios with vertical bars indicating one standard error. Horizontal lines indicate years  
 68 represented.
