# Supplementary material for: Declining, seasonal-varying emissions of sulfur hexafluoride from the United States point to a new mitigation opportunity
Source: Copernicus journal article supplement (doi:10.5194/egusphere-2022-862), 2022-09-15
Supplement: Supplementary file 2 [file egusphere-2022-862-supplement.pdf]

1 **Supplementary materials for:**

2  
3  
4 **Declining, seasonal-varying emissions of sulfur hexafluoride from**  
5 **the United States point to a new mitigation opportunity**  
6

7 Lei Hu<sup>1,2\*</sup>, Deborah Ottinger<sup>3</sup>, Stephanie Bogle<sup>3</sup>, Stephen Montzka<sup>2</sup>, Phil DeCola<sup>4,5</sup>, Ed  
8 Dlugokencky<sup>2</sup>, Arlyn Andrews<sup>2</sup>, Kirk Thoning<sup>2</sup>, Colm Sweeney<sup>2</sup>, Geoff Dutton<sup>1,2</sup>, Lauren Aeppli<sup>5</sup>,  
9 Andrew Crotwell<sup>1,2</sup>

10  
11 <sup>1</sup> Cooperative Institute for Research in Environmental Sciences, University of Colorado-Boulder,  
12 Boulder, CO, USA

13 <sup>2</sup> Global Monitoring Laboratory, US National Oceanic and Atmospheric Administration, Boulder,  
14 CO, USA

15 <sup>3</sup> Climate Change Division, US Environmental Protection Agency, Washington D.C., USA

16 <sup>4</sup> University of Maryland, College Park, MD, USA

17 <sup>5</sup> Gist.Earth LLC, College Park, MD, USA

18  
19 \*Correspondence to lei.hu@noaa.gov  
20  
21  
22  
23

24 **Figures S1 – S3.**  
25  
26  
27  
28  
29  
30  
31  
32  
33  
34  
35  
36  
37  
38  
39

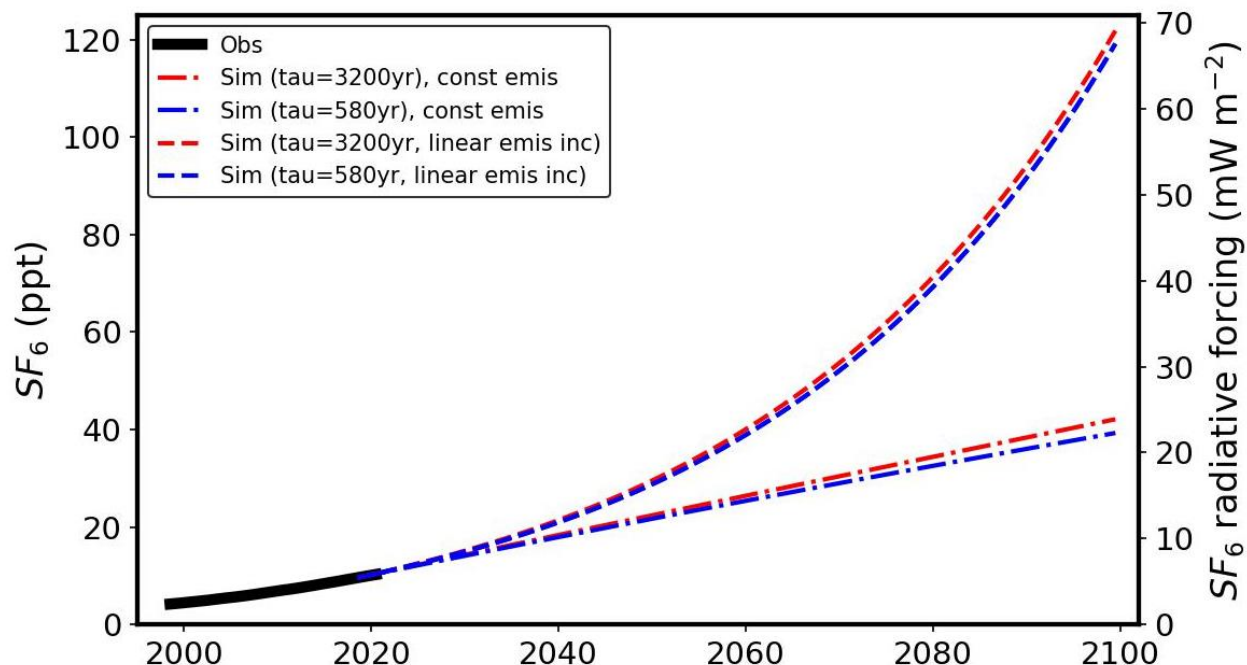

**Fig. S1.** Global atmospheric SF<sub>6</sub> mole fractions observed by NOAA for 1998 – 2021 and projected to 2100, considering two different atmospheric lifetimes (580 years and 3200 years) and two emission scenarios (a constant global emission of 9 Gg yr<sup>-1</sup> “const emiss” and a constant emission increase of 0.2 (Gg yr<sup>-1</sup>) yr<sup>-1</sup> with an initial global emission of 9 Gg yr<sup>-1</sup> in 2018 “linear emis inc”). The corresponding radiative forcing is plotted on the right.

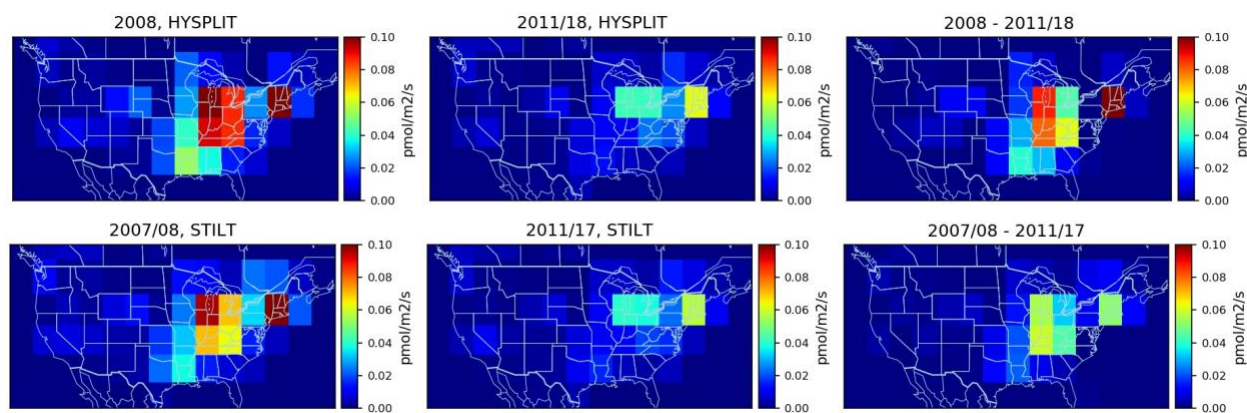

**Fig. S2.** Emission maps of SF<sub>6</sub> derived from atmospheric observations using two transport models (HYSPLIT-NAMS in upper panels and WRF-STILT in lower panels) for 2007 – 2008 and 2011–2018 periods. The third columns indicate emission differences between both periods. Note that there is a small difference in the time period plotted due to the slightly different availability of footprints from both transport models.

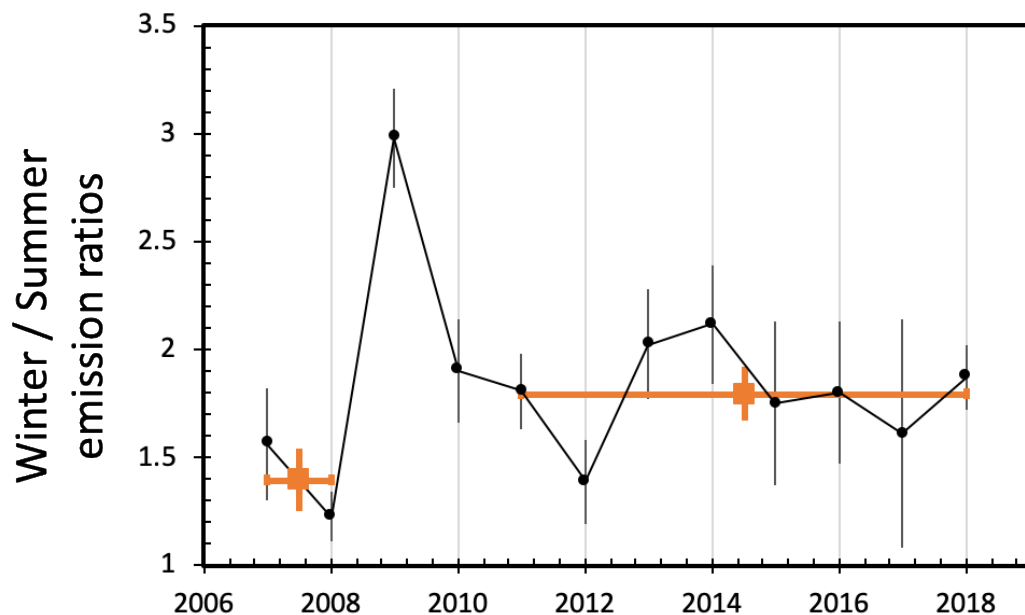

57

58 **Fig. S3.** The winter-to-summer ratios of US national SF<sub>6</sub> emissions between winter (Nov - Feb)  
59 and summer (May - Aug) by year, derived from the atmospheric observations. Errorbars represent  
60 one standard deviation derived from 12 ensemble members. Orange squares indicate multi-year  
61 average ratios with vertical bars indicating one standard error. Horizontal lines indicate years  
62 covered.
